# Supplementary material
Source: MDPI journal article supplement (https://www.mdpi.com/2071-1050/15/4/3790)
Supplement: s1 [file s1]

**Supplementary Table S1.** Effect of different concentrations of cadmium (Cd) on tolerance index (%), germination percentage (%), germination index, coefficient of velocity of germination, vigor index, vitality index, mean daily germination (%), fresh biomass per seedling (gm), dry biomass per seedling (gm), and radicle and plumule length (cm) in mung bean seedlings.

| Treatments | Tolerance index | Germination percentage | Germination index | Coefficient of velocity of germination | Vigor index    | Vitality index | Mean daily germination | Fresh biomass per seedling | Dry biomass per seedling | Radicle length | Plumule length |
|------------|-----------------|------------------------|-------------------|----------------------------------------|----------------|----------------|------------------------|----------------------------|--------------------------|----------------|----------------|
| Control    | 100.00±9.30a    | 94.40±3.45a            | 3.70±0.16a        | 94.00±1.81a                            | 2050.00±71.00a | 5.15±0.39a     | 15.70±1.38a            | 0.470±0.011a               | 0.370±0.012a             | 9.17±0.52a     | 12.55±0.83a    |
| 25µM Cd    | 94.00±5.30b     | 88.80±2.38a            | 3.50±0.44a        | 86.40±2.68b                            | 1722.00±54.00b | 4.32±0.67b     | 14.80±0.87a            | 0.413±0.010a               | 0.292±0.014a             | 8.71±0.52a     | 11.29±0.76a    |
| 50µM Cd    | 88.30±6.40c     | 77.70±4.00b            | 3.10±0.33b        | 70.56±1.44c                            | 1373.50±59.00c | 3.19±0.31c     | 12.90±2.15b            | 0.362±0.009b               | 0.200±0.016b             | 8.07±0.47b     | 9.29±0.54b     |
| 75µM Cd    | 76.00±5.31d     | 66.60±2.32c            | 2.30±0.23c        | 51.84±2.35d                            | 984.00±9.00d   | 2.20±0.34d     | 11.10±0.93c            | 0.263±0.008c               | 0.129±0.015c             | 7.07±0.44c     | 7.65±1.14c     |
| 100µM Cd   | 52.00±4.50e     | 38.80±3.12d            | 1.50±0.19d        | 17.64±1.05e                            | 410±13.14e     | 0.92±0.04e     | 6.40±0.84d             | 0.141±0.013d               | 0.063±0.013d             | 3.67±0.06d     | 4.40±0.35d     |

\* The values containing same letter are non-significant and the values containing different letter are significantly different at ( $p \leq 0.05$ ).

**Supplementary Table S2.** Comparative effect of different concentrations of cadmium (Cd) singly or in combination with gibberellic acid (GA3, 10 µM; µg g<sup>-1</sup> FW) and paclobutrazol (PBZ, 10 µM) on endogenous GA3 content in mung bean seedlings at 7 DAS.

| Endogenous gibberellic acid (GA3) content |                    |         |                    |          |            |
|-------------------------------------------|--------------------|---------|--------------------|----------|------------|
| Experimental Set 1                        | Experimental Set 2 |         | Experimental Set 3 |          |            |
| Control                                   | 8.70±1.08a         | Control | 8.71±1.09b         | Control  | 8.83±1.13a |
| 25µM Cd                                   | 7.22±0.85b         | 50µM Cd | 5.66±0.72d         | 50µM Cd  | 5.56±0.69b |
| 50µM Cd                                   | 5.65±0.72c         | 75µM Cd | 4.35±0.68e         | 75µM Cd  | 4.23±0.63c |
| 75µM Cd                                   | 4.26±0.65d         | 10µM GA | 14.37±1.99a        | 10µM PBZ | 0.61±0.13d |

|          |            |                 |            |                  |            |
|----------|------------|-----------------|------------|------------------|------------|
| 100μM Cd | 1.91±0.43e | 10μM GA+50μM Cd | 8.53±1.04b | 10μM PBZ+50μM Cd | 5.56±0.54b |
|          |            | 10μM GA+75μM Cd | 6.18±0.64c | 10μM PBZ+75μM Cd | 4.15±0.59c |

\* The values containing same letter are non-significant and the values containing different letter are significantly different at ( $p \leq 0.05$ ).
